# Supplementary material
Source: PubMed Central journal article supplement (PMC5476448)
Supplement: NIHMS5272-supplement-Goi_supplementary_data.pdf [file NIHMS5272-supplement-Goi_supplementary_data.pdf]

**Supplementary Information**

**Patterning Mechanisms of the Sub-Intestinal Venous Plexus in Zebrafish**

**Michela Goi, and Sarah J. Childs\***

**Table S1. Small molecule inhibitor doses**

| Drug Name                                | Dose                  | Reference               | Catalogue Number | Company                    |
|------------------------------------------|-----------------------|-------------------------|------------------|----------------------------|
| <b>DMH1</b>                              | 25, 50 or 100 $\mu$ M | (Hao et al., 2010)      | D8946            | Sigma                      |
| <b>DMH4</b>                              | 25, 50 or 100 $\mu$ M | (Hao et al., 2010)      | D8696            | Sigma                      |
| <b>Dorsomorphin</b>                      | 50 $\mu$ M            | (Hao et al., 2010)      | P5499            | Sigma                      |
| <b>SL327</b>                             | 30 $\mu$ M            | (Wiley et al., 2011)    | S4069            | Sigma                      |
| <b>DAPT</b>                              | 100 $\mu$ M           | (Geling et al., 2002)   | D5942            | Sigma                      |
| <b>LY-411575</b>                         | 25 $\mu$ M            | (Grotek et al., 2013)   | SML0506          | Sigma                      |
| <b>Pdgfr Tyrosine Kinase Inhibitor V</b> | 0.25 $\mu$ M          | (Wiens et al., 2010)    | 521234           | Calbiochem                 |
| <b>Imatinib mesylate</b>                 | 50 $\mu$ M            | (Nishioka et al., 2008) | SC-202180        | Santa Cruz Biotechnology   |
| <b>Cyclopamine</b>                       | 50 $\mu$ M            | (Lamont et al., 2010)   | C988400          | Toronto Research Chemicals |

**Table S2. *In situ* hybridization probes**

| Gene                            | Source                                                                        |
|---------------------------------|-------------------------------------------------------------------------------|
| <b><i>gata6</i></b>             | (Reiter et al., 1999)                                                         |
| <b><i>vegfr2 (kdrl)</i></b>     | Addgene plasmid 22417                                                         |
| <b><i>vegfaa</i></b>            | F-primer: 5'-GCTCTCCTCCATCTGTCTGC-3'<br>R-primer: 5'-CCTTTGGCCTGCATTACAC-3'   |
| <b><i>vegfab</i></b>            | F-primer: 5'-GCAAAACCGTGGTTCCAGAC-3'<br>R-primer: 5'-GACGAGCTGAAACGACAACG-3'  |
| <b><i>plexinD1</i></b>          | F-primer: 5'-AAGATTGAGCCACTGTCCGGG-3'<br>R-primer: 5'-CACGCCAGAGACGGAGATAC-3' |
| <b><i>sema3aa (sema3a1)</i></b> | (Yee et al., 1999)                                                            |
| <b><i>sema3ab (sema3a2)</i></b> | (Torres-Vazquez et al., 2004)                                                 |
| <b><i>alk2 (acvrl1)</i></b>     | F-primer: 5'-CTGGCTGTGCGAATACTGAA-3'<br>R-primer: 5'-GCCAGAAAAGACAGCAGACC-3'  |
| <b><i>bmp4</i></b>              | (Zeng and Childs, 2012)                                                       |
| <b><i>vegfr3 (flt4)</i></b>     | F-primer: 5'-CAGTCCAAAACAGCCAGCAC-3'<br>R-primer: 5'-TCGAGTGCCCTTCCCATAGA-3'  |
| <b><i>vegfc</i></b>             | F-primer: 5'-ATGCCATGCAGGAGCATTCA-3'<br>R-primer: 5'-TGCGGTTGAGAGGTTGACTC-3'  |
| <b><i>mrc1</i></b>              | (Wong et al., 2009)                                                           |
| <b><i>ephrinB2a</i></b>         | (Lawson et al., 2001)                                                         |
| <b><i>gridlock</i></b>          | (Zhong et al., 2000)                                                          |
| <b><i>etsrp</i></b>             | (Wong et al., 2009)                                                           |

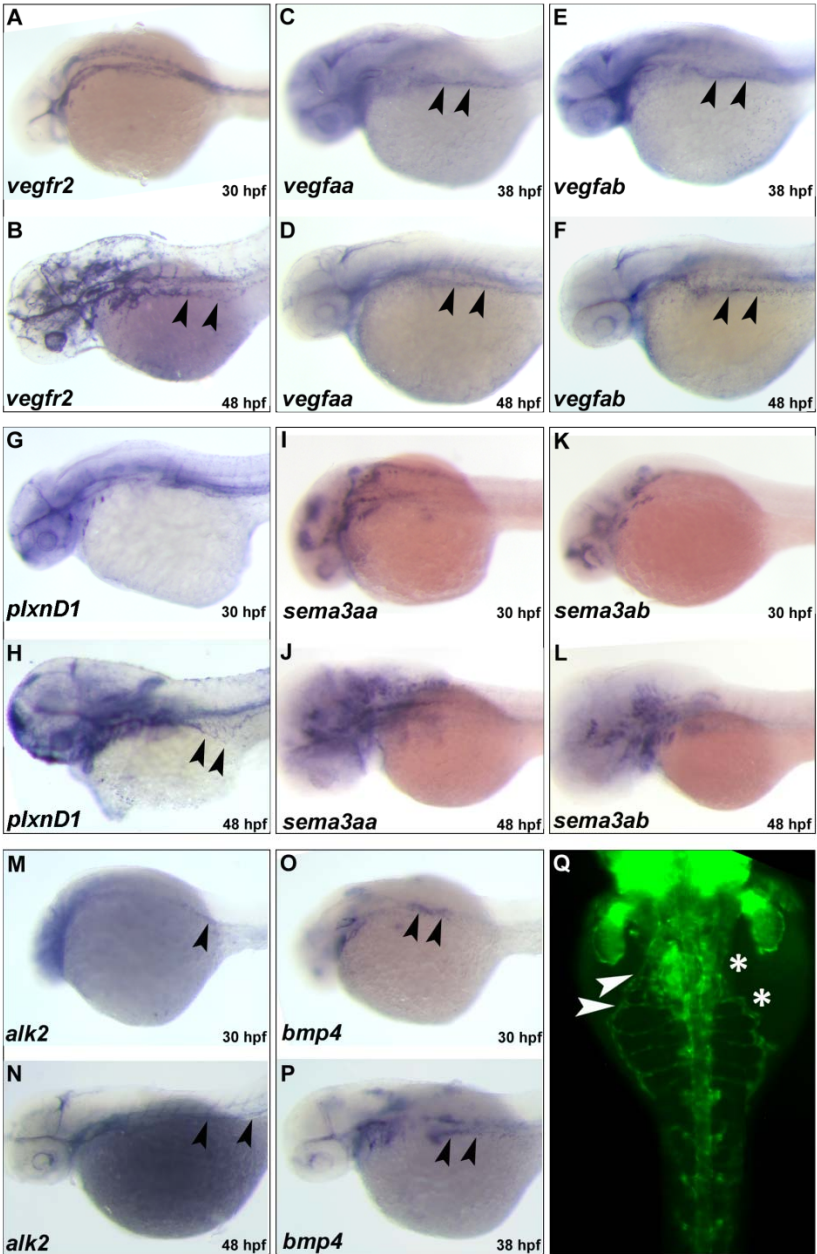

**Fig. S1. Expression of growth factors and ligands during SIVP development and SIVP left-right asymmetry**

(A-B) *vegfr2* is expressed in the SIVP (arrowheads). (C-F) *vegfaa* and *vegfab* are expressed in the pronephric ducts (arrowheads), close to the region where SIVP develops. (G-H) *plexinD1* is expressed in the SIVP (arrowheads). (I-L) *sema3aa* and *sema3ab* are expressed in the head but have weak expression in the trunk at both 30 and 48 hpf. (M-N) *alk2* is expressed in blood vessels including the axial vein (arrowheads) at 30 and 48 hpf. (O-P) *bmp4* is expressed in the gut (arrowheads). (Q) Dorsal view of a 2 dpf *Tg(fli:EGFP)<sup>y1</sup>* embryo with head at the top showing left-right SIVP asymmetry. The left SIVP extends to a greater distance and also more anteriorly (white arrowheads) while the right SIVP is smaller and posterior only (white asterisks).

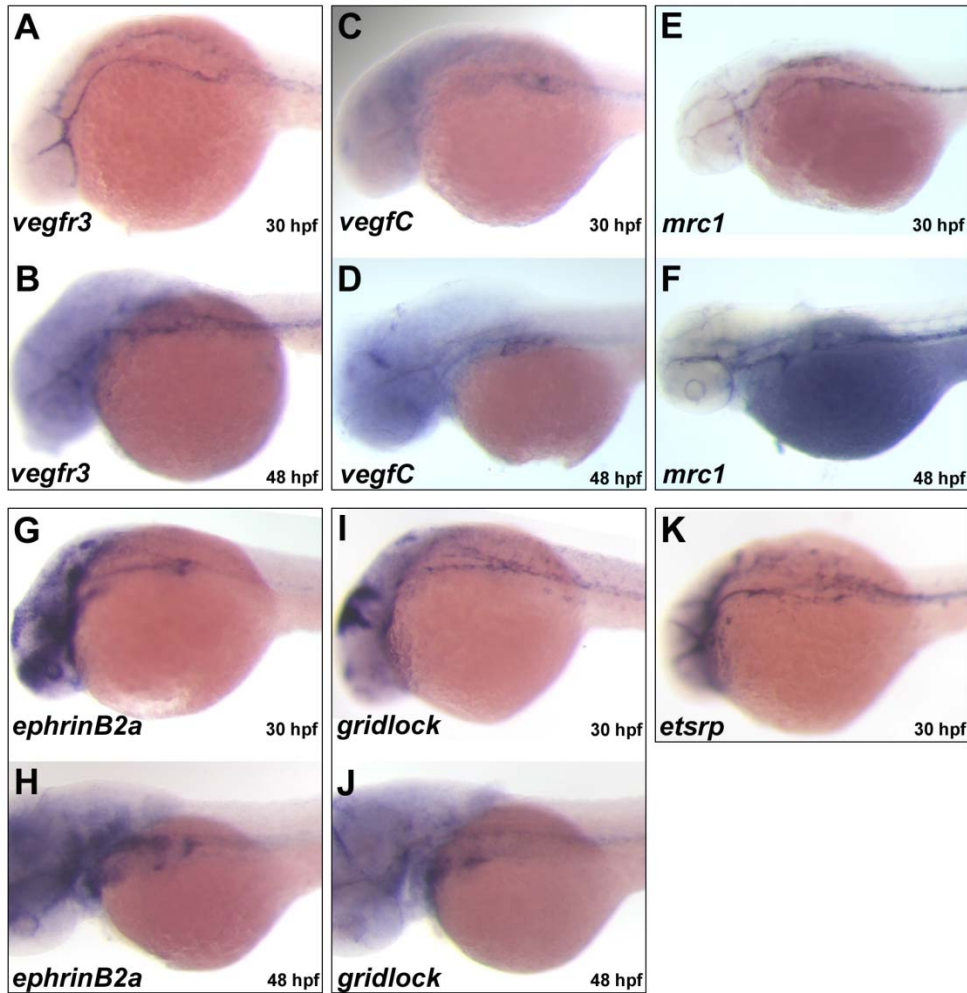

**Fig. S2. Expression of venous and arterial markers in the SIVP region during the window of sprouting.**

(A-B) *vegfr3* receptor. (C-D) *vegfC*, ligand for Vegfr3. (E-F) *mrc1*. (G-H) *ephrinB2a*. (I-J) *gridlock* (K) *etsrp*.

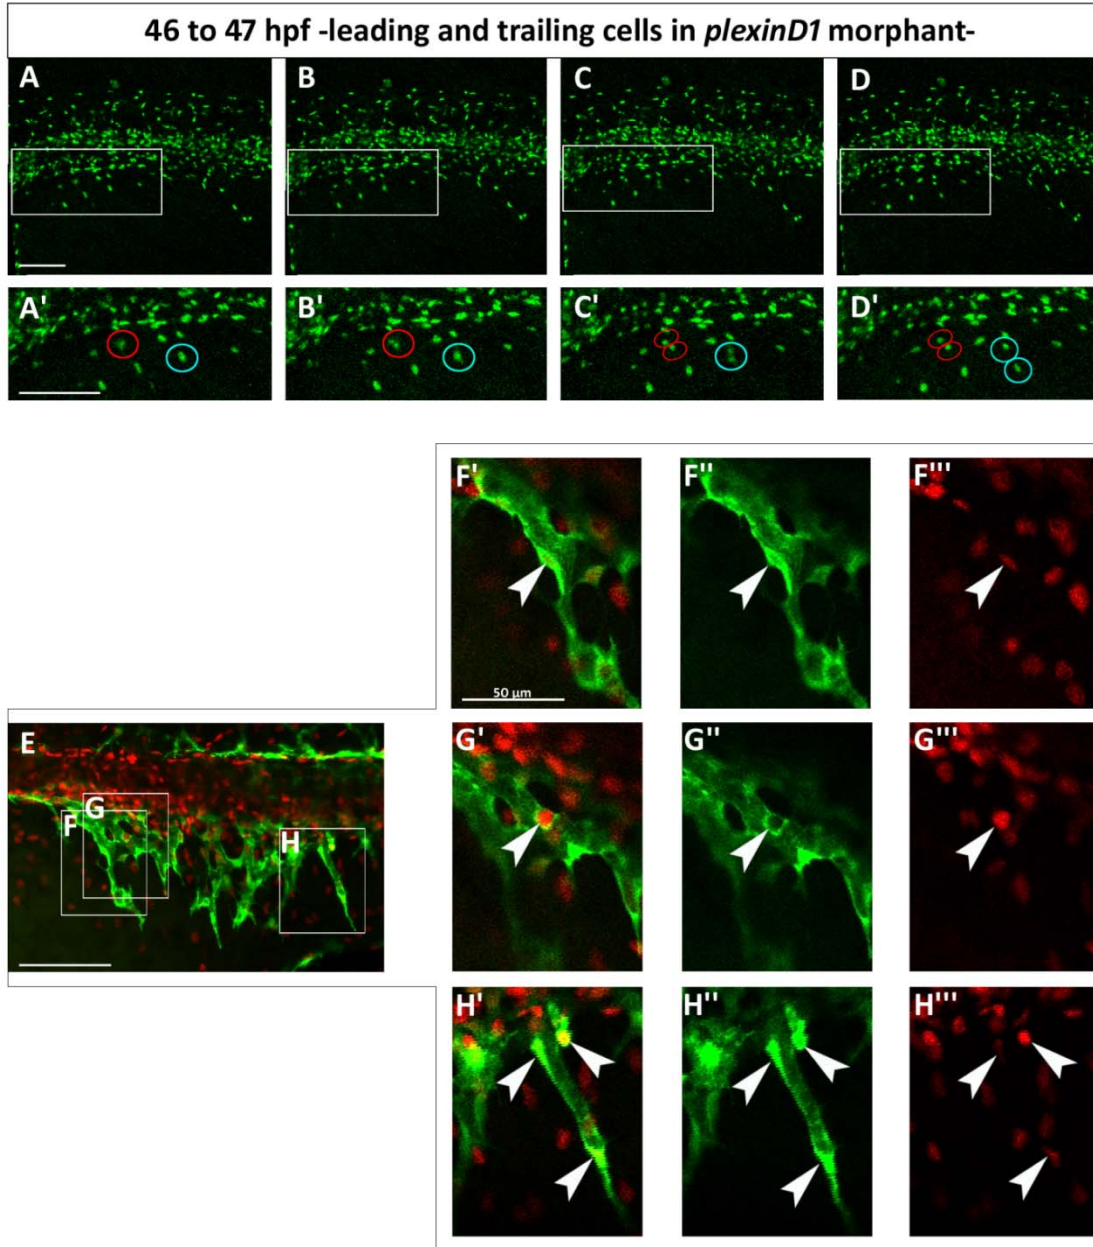

**Fig. S3. Both leading and trailing cells proliferate during migration in *plexinD1* morphants**  
 Confocal micrographs from a time-lapse of a *Tg(fli:EGFP)<sup>y7</sup>* embryo injected with *plexinD1* morpholino. Enlargements are below each single original frame. (A'-D') Red circles indicate a dividing trailing cell and the blue circles point a dividing leading cell from about 46 to 47 hpf. (E-H) Analysis of proliferation using EdU staining in *obd* mutants. Red marks EdU staining and green marks endothelial cells in *Tg(fli:EGFP)<sup>y1</sup>* wild type and *plexinD1* morphant embryos at 48 hpf. Boxes in E indicate the position of the enlargements. White arrowheads indicate the SIVP proliferating cells. Unspecified scale bars represent 100 μm.

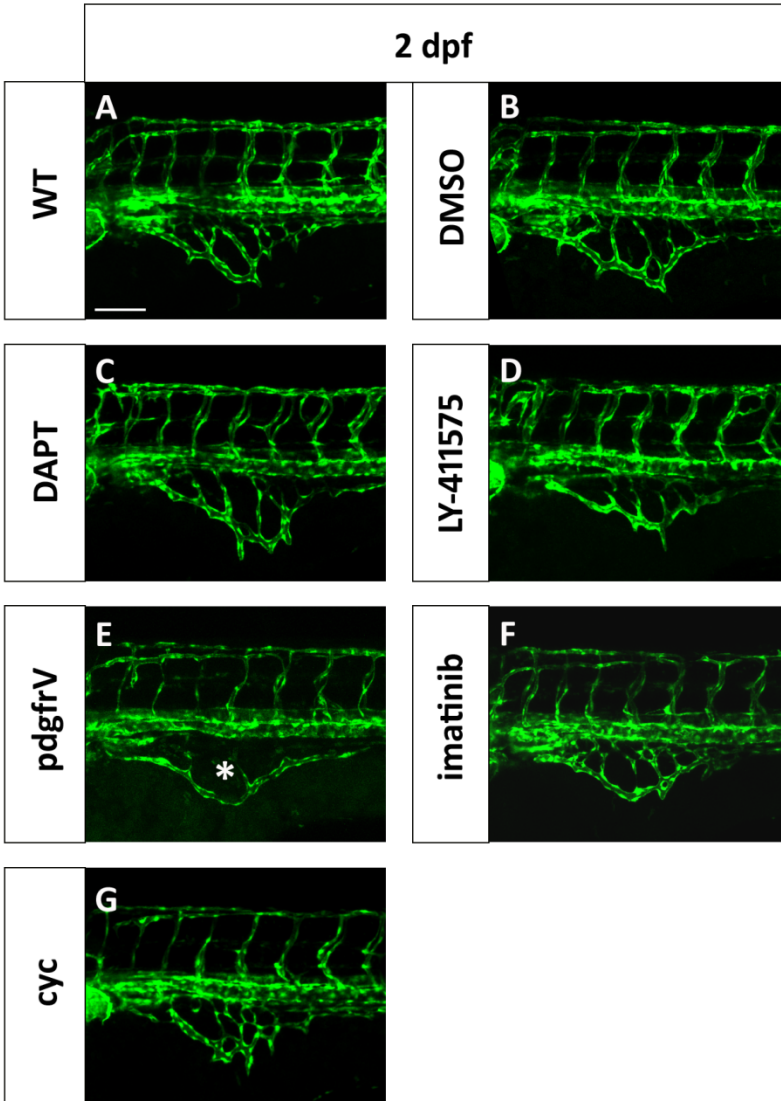

**Fig. S4. Notch, Pdgf and Shh pathways do not play an essential role in SIVP development**

(A-H) Phenotype of embryos treated with small molecule inhibitors from 24 hpf to 48 hpf. (A) Untreated control embryo (B) DMSO treated control embryos. (C) 100  $\mu$ M DAPT treated embryos to examine the role of Notch. (D) 25  $\mu$ M LY-411575, a  $\gamma$ -secretase inhibitor to examine the role of Notch. (E) 0.25  $\mu$ M Pdgfr inhibitor V treated embryo, blocking Pdgfr $\alpha$  and  $\beta$  and Vegfr2, shows a similar phenotype (asterisk) to that seen with the VEGFR2 inhibitor DMH4. However a second Pdgfr inhibitor (I, 50  $\mu$ M imatinib) causes no alteration in SIVP morphology. (G) 50  $\mu$ M cyclopamine treated embryo, a hedgehog receptor antagonist. Scale bar represents 100  $\mu$ m.

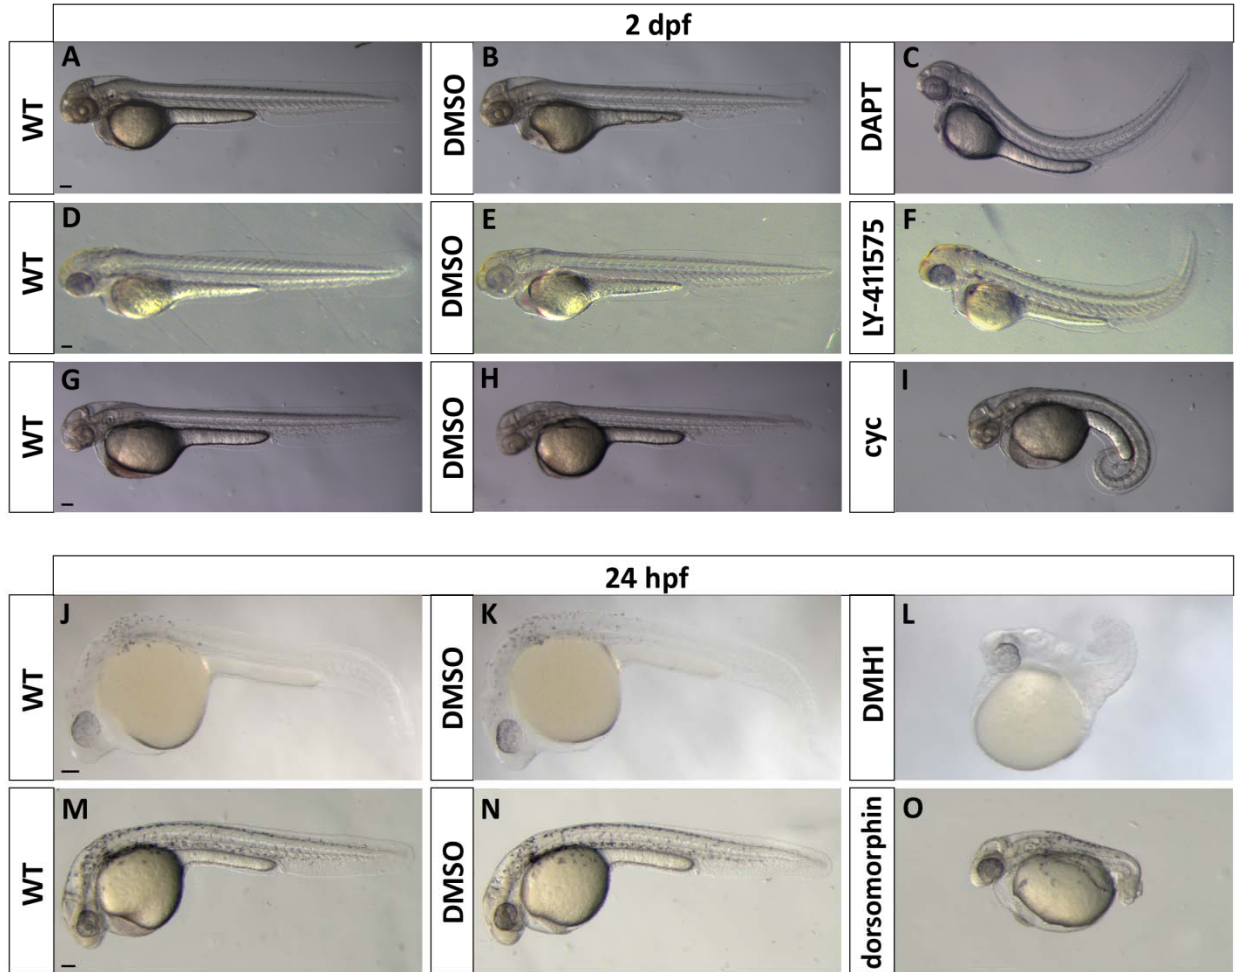

**Fig. S5. Positive controls for drug treatments.**

(A) Brightfield image of 2 dpf wild-type embryo. (B-C) 2 dpf embryos treated with DMSO and 100  $\mu$ M DAPT from 24 hpf. Inhibition of Notch by DAPT causes a curved body axis. The same curved axis phenotype is obtained using 25  $\mu$ M LY-411575 (D-F). (G) Brightfield image of 2 dpf wild-type embryo. (H-I) 2 dpf embryos treated with DMSO and 50  $\mu$ M cyclopamine from 4 hpf. Cyclopamine treated embryos show a characteristic curly-down body axis. (J) Brightfield image of 24 hpf wild-type embryo. (K-L) 24 hpf embryos treated with DMSO and 1  $\mu$ M DMH1 from 4 hpf. The dorsalizing effect of inhibition of Bmp signaling is observed (M-O). The same phenotype is obtained using 1  $\mu$ M dorsomorphin. Scale bars represent 100  $\mu$ m.

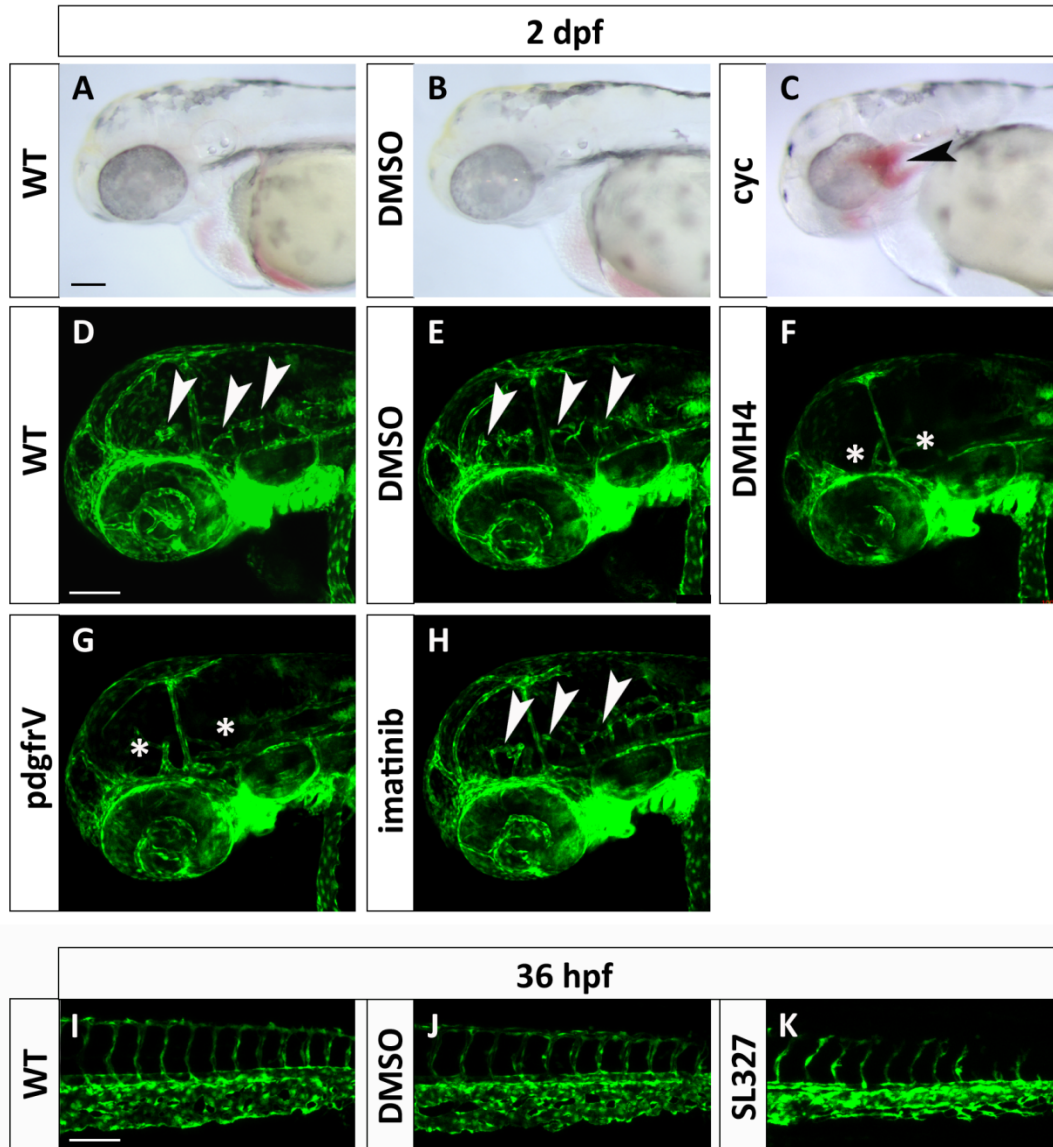

**Fig. S6. Positive controls for cyclopamine, DMH4, Pdgfr inhibitor V, imatinib and SL327 drug treatments.**

(A-C) Brightfield images of 2 dpf wild-type control and treated embryos from 24 hpf. (A-B) Wild-type and DMSO treated control embryos. (C) Embryo treated with 50  $\mu$ M cyclopamine showing hemorrhage in the head indicated by the black arrowhead.

(D-H) Confocal images of 2 dpf *Tg(fli:EGFP)<sup>y1</sup>* embryos untreated or treated with different inhibitors from 24 hpf. (D-E) Untreated and DMSO treated control embryos. White arrowheads mark the presence of CtAs in the head. (F-G) Embryos treated with 50  $\mu$ M DMH4 and 0.25  $\mu$ M Pdgfr inhibitor V show absence of CtAs (asterisks) but 50  $\mu$ M imatinib treatment (H) does not affect CtA development (white arrowheads) suggesting that inhibition of arterial sprouts with Pdgfr inhibitor V is due to inhibition of Vegfr2 in addition to Pdgfr. (I-J) Untreated and DMSO treated control embryos from 24 to 36 hpf. (K) 60  $\mu$ M SL327 inhibits Mek-1 and Mek-2 and causes alteration of caudal vein plexus development. Scale bars represent 100  $\mu$ m.



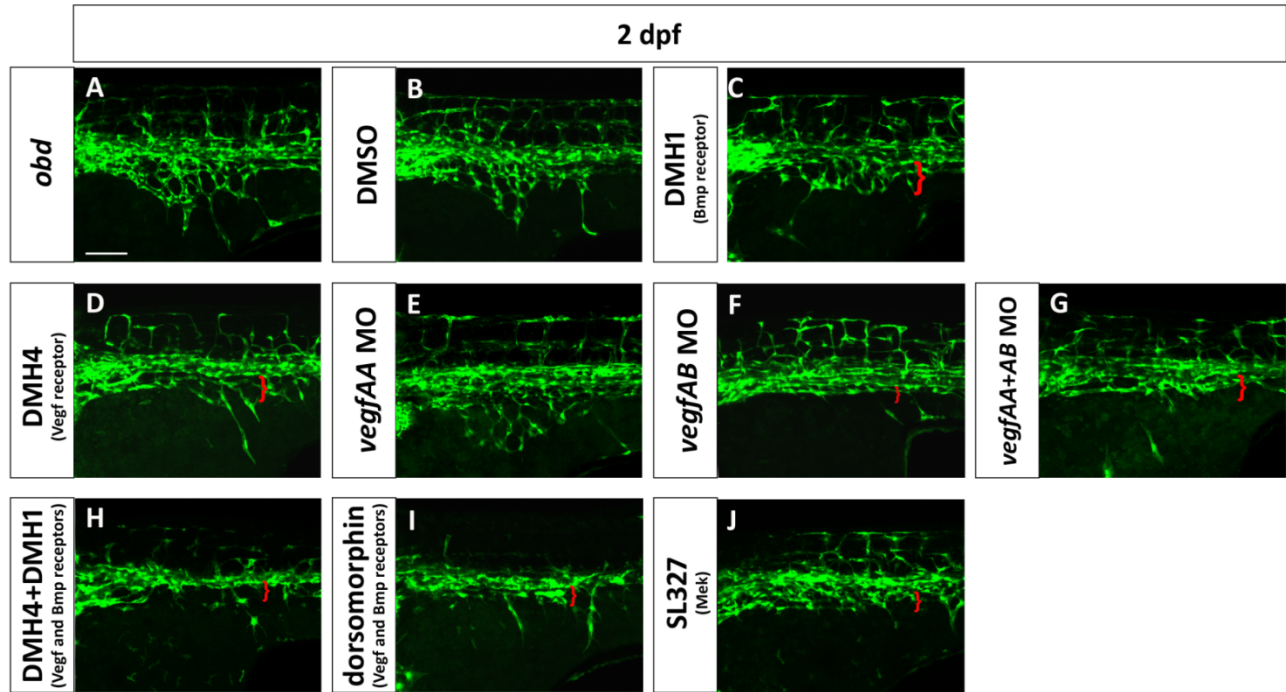

**Fig. S7. Vegf and Bmp control *obd* SIVP development**

(A-J) Phenotype of *obd* mutant embryos treated with small molecule inhibitors from 24 hpf to 48 hpf or morpholinos. (A) Untreated control *obd* mutant (B) DMSO vehicle treated *obd* mutant. (C) 100  $\mu$ M DMH1 treated *obd* mutant. (D) 100  $\mu$ M DMH4 treated *obd* mutant. (E)  $\sim$  2 ng/e *vegfaa* morpholino treated *obd* mutant. (F)  $\sim$  2 ng/e *vegfab* morpholino treated *obd* mutant. (G) *vegfaa* and *vegfab* treated *obd* mutant. (H) DMH4 and DMH1, 50  $\mu$ M each-treated *obd* mutant. (I) 50  $\mu$ M dorsomorphin treated *obd* mutant. (J) 30  $\mu$ M SL327, a Mek-1/Mek-2 inhibitor-treated *obd* mutant. Red brackets indicate the reduced expansion of the SIVP. Scale bar represents 100  $\mu$ m.

**Movie 1**

SIVP development in a *Tg(fli:EGFP)<sup>y1</sup>* transgenic embryo from around 27 to 47 hpf. Anterior is to the left.

**Movie 2**

SIVP development in a *Tg(fli:EGFP)<sup>y1</sup>* transgenic embryo from around 30 to 76 hpf. Anterior is to the left.

**Movie 3**

SIVP cell proliferation in a *Tg(fli:EGFP)<sup>y7</sup>* transgenic embryo from around 32 to 75 hpf. Anterior is to the left.

**Movie 4**

SIVP development in a *abd<sup>fov01b</sup>; Tg(fli:EGFP)<sup>y1</sup>* transgenic embryo from around 30 to 76 hpf. Anterior is to the left.

**Movie 5**

SIVP cell proliferation in a *Tg(fli:EGFP)<sup>y7</sup>* embryo injected with *plexinD1* morpholino and imaged from around 32 to 75 hpf. Anterior is to the left.

## References

- Geling, A., Steiner, H., Willem, M., Bally-Cuif, L., Haass, C., 2002. A gamma-secretase inhibitor blocks Notch signaling in vivo and causes a severe neurogenic phenotype in zebrafish. *EMBO Rep* 3, 688-694.
- Grotek, B., Wehner, D., Weidinger, G., 2013. Notch signaling coordinates cellular proliferation with differentiation during zebrafish fin regeneration. *Development* 140, 1412-1423.
- Hao, J., Ho, J.N., Lewis, J.A., Karim, K.A., Daniels, R.N., Gentry, P.R., Hopkins, C.R., Lindsley, C.W., Hong, C.C., 2010. In vivo structure-activity relationship study of dorsomorphin analogues identifies selective VEGF and BMP inhibitors. *ACS Chem Biol* 5, 245-253.
- Lamont, R.E., Vu, W., Carter, A.D., Serluca, F.C., MacRae, C.A., Childs, S.J., 2010. Hedgehog signaling via angiopoietin1 is required for developmental vascular stability. *Mech Dev* 127, 159-168.
- Lawson, N.D., Scheer, N., Pham, V.N., Kim, C.H., Chitnis, A.B., Campos-Ortega, J.A., Weinstein, B.M., 2001. Notch signaling is required for arterial-venous differentiation during embryonic vascular development. *Development* 128, 3675-3683.
- Nishioka, C., Ikezoe, T., Yang, J., Miwa, A., Tasaka, T., Kuwayama, Y., Togitani, K., Koeffler, H.P., Yokoyama, A., 2008. Ki11502, a novel multitargeted receptor tyrosine kinase inhibitor, induces growth arrest and apoptosis of human leukemia cells in vitro and in vivo. *Blood* 111, 5086-5092.
- Reiter, J.F., Alexander, J., Rodaway, A., Yelon, D., Patient, R., Holder, N., Stainier, D.Y., 1999. Gata5 is required for the development of the heart and endoderm in zebrafish. *Genes Dev* 13, 2983-2995.
- Torres-Vazquez, J., Gitler, A.D., Fraser, S.D., Berk, J.D., Van, N.P., Fishman, M.C., Childs, S., Epstein, J.A., Weinstein, B.M., 2004. Semaphorin-plexin signaling guides patterning of the developing vasculature. *Dev Cell* 7, 117-123.
- Wiens, K.M., Lee, H.L., Shimada, H., Metcalf, A.E., Chao, M.Y., Lien, C.L., 2010. Platelet-derived growth factor receptor beta is critical for zebrafish intersegmental vessel formation. *PLoS One* 5, e11324.
- Wiley, D.M., Kim, J.D., Hao, J., Hong, C.C., Bautch, V.L., Jin, S.W., 2011. Distinct signalling pathways regulate sprouting angiogenesis from the dorsal aorta and the axial vein. *Nat Cell Biol* 13, 686-692.
- Wong, K.S., Proulx, K., Rost, M.S., Sumanas, S., 2009. Identification of vasculature-specific genes by microarray analysis of Etsrp/Etv2 overexpressing zebrafish embryos. *Dev Dyn* 238, 1836-1850.
- Yee, C.S., Chandrasekhar, A., Halloran, M.C., Shoji, W., Warren, J.T., Kuwada, J.Y., 1999. Molecular cloning, expression, and activity of zebrafish semaphorin Z1a. *Brain Res Bull* 48, 581-593.
- Zeng, L., Childs, S.J., 2012. The smooth muscle microRNA miR-145 regulates gut epithelial development via a paracrine mechanism. *Dev Biol* 367, 178-186.
- Zhong, T.P., Rosenberg, M., Mohideen, M.A., Weinstein, B., Fishman, M.C., 2000. gridlock, an HLH gene required for assembly of the aorta in zebrafish. *Science* 287, 1820-1824.
